# Supplementary material for: Analysis of Selected Toll-like Receptors in the Pathogenesis and Advancement of Non-Small-Cell Lung Cancer
Source: MDPI journal article supplement (doi:10.3390/jcm13102793), 2024-05-09
Supplement: s1 [file s1]

**Supplementary Materials Table S1.** Selected parameters of morphology, biochemistry and immunophenotype of NSCLC patients after one year of observation, taking into account their survival status

| Parameters                                        | Patients with NSCLC alive |                          | Patients with NSCLC dead |                           | p-value |
|---------------------------------------------------|---------------------------|--------------------------|--------------------------|---------------------------|---------|
|                                                   | Mean±SD                   | Median (Range)           | Mean±SD                  | Median (Range)            |         |
| WBC [10 <sup>3</sup> /mm <sup>3</sup> ]           | 6.68± 1.57                | 6.33<br>(3.90- 11.63)    | 11.17± 4.29              | 9.55<br>(5.44- 24.73)     | 0.000*  |
| LYM [10 <sup>3</sup> /mm <sup>3</sup> ]           | 1.39± 0.55                | 1.25<br>(0.57-2.88)      | 1.72± 0.86               | 1.43<br>(0.44-4.60)       | 0.068   |
| MON [10 <sup>3</sup> /mm <sup>3</sup> ]           | 0.57± 0.19                | 0.53<br>(0.24-1.24)      | 0.87± 0.30               | 0.79<br>(0.48 -1.65)      | 0.000*  |
| NEU [10 <sup>3</sup> /mm <sup>3</sup> ]           | 4.45± 1.33                | 4.46<br>(2.28-8.75)      | 8.34± 3.87               | 6.84<br>(3.90-21.70)      | 0.000*  |
| RBC [10 <sup>6</sup> /mm <sup>3</sup> ]           | 3.33± 0.33                | 3.36<br>(2.34-3.91)      | 4.53± 0.51               | 4.58<br>(3.60-5.36)       | 0.000*  |
| HGB [g/dl]                                        | 9.76± 1.10                | 9.87<br>(7.10-12.57)     | 12.94± 1.91              | 12.90<br>(9.20-16.70)     |         |
| PLT [10 <sup>3</sup> /mm <sup>3</sup> ]           | 229.13± 82.06             | 219.04<br>(91.76-564.45) | 386.60±<br>119.23        | 349.00<br>(198.00-674.00) | 0.000*  |
| CRP                                               | 15.93± 18.76              | 11.83<br>(0.53-117.13)   | 36.05±34.79              | 21.79<br>(1.89-134.43)    | 0.000*  |
| CD3+ T cells [%]                                  | 50.72±8.59                | 51.62<br>(15.10-65.90)   | 70.18±13.61              | 69.76<br>(22.64-76.08)    | 0.000*  |
| CD3+CD8+ T cells [%]                              | 21.89±7.51                | 20.61<br>(7.20-41.69)    | 29.32±12.08              | 29.82<br>(8.95-57.23)     | 0.000*  |
| CD3+CD4+ T cells [%]                              | 28.19±6.71                | 28.80<br>(7.67-41.06)    | 39.80±9.85               | 39.66<br>(11.58-57.00)    | 0.000*  |
| The ratio of CD3+CD4+ T cells to CD3+CD8+ T cells | 1.21± 1.11                | 0.96<br>(0.33-8.74)      | 1.63±0.91                | 1.40<br>(0.51-4.20)       | 0.000*  |
| CD19+ B cells [%]                                 | 6.47±6.68                 | 5.57<br>(1.18-15.09)     | 8.25±5.91                | 6.20<br>(1.92-21.41)      | 0.265   |

**Supplementary Materials Table S2.** Analysis of the percentage of TLRs tested on selected subpopulations of peripheral blood lymphocytes and their serum concentration in NSCLC patients after one year of observation, taking into account their survival status

| Parameters                                                      | Patients with NSCLC alive |                      | Patients with NSCLC dead |                       | p-value |
|-----------------------------------------------------------------|---------------------------|----------------------|--------------------------|-----------------------|---------|
|                                                                 | Mean±SD                   | Median (Range)       | Mean±SD                  | Median (Range)        |         |
| CD4+TLR-2+ T cells [%]                                          | 3.86±2.71                 | 3.15<br>(0.95-15.21) | 7.85±4.70                | 7.35<br>(2.10-21.02)  | 0.000*  |
| CD8+TLR-2+ T cells [%]                                          | 5.76±3.17                 | 4.95<br>(1.57-16.23) | 9.31±4.68                | 8.35<br>(3.61-19.25)  | 0.000*  |
| CD19+TLR-2+ B cells [%]                                         | 6.03±3.34                 | 4.54<br>(0.94-13.28) | 9.04±4.21                | 7.33<br>(3.96-17.63)  | 0.000*  |
| CD4+TLR-3+ T cells [%]                                          | 1.93±0.6                  | 1.81<br>(0.77-3.63)  | 3.14±0.84                | 2.81<br>(1.98-4.85)   | 0.000*  |
| CD8+TLR-3+ T cells [%]                                          | 1.73±0.58                 | 1.65<br>(0.56-2.95)  | 2.86±0.49                | 2.97<br>(2.02-3.83)   | 0.000*  |
| CD19+TLR-3+ B cells [%]                                         | 1.93±0.63                 | 1.83<br>(0.72-3.26)  | 3.34±0.58                | 3.39<br>(2.15-4.41)   | 0.000*  |
| CD4+TLR-4+ T cells [%]                                          | 5.16±2.40                 | 4.34<br>(1.74-12.37) | 8.34±3.97                | 6.95<br>(4.16-17.39)  | 0.000*  |
| CD8+TLR-4+ T cells [%]                                          | 5.87±2.73                 | 5.52<br>(1.53-13.12) | 9.97±4.6                 | 7.62<br>(4.65-18.80)  | 0.000*  |
| CD19+TLR-4+ B cells [%]                                         | 5.40±2.69                 | 4.81<br>(2.56-17.95) | 9.60±5.67                | 6.82<br>(4.07-25.13)  | 0.000*  |
| CD4+TLR-7+ T cells [%]                                          | 1.38±0.43                 | 1.30<br>(0.73-2.58)  | 2.30±0.38                | 2.28<br>(1.56-2.97)   | 0.000*  |
| CD8+TLR-7+ T cells [%]                                          | 1.81±0.61                 | 1.78<br>(0.75-3.24)  | 2.85±0.62                | 2.66<br>(1.33-4.47)   | 0.000*  |
| CD19+TLR-7+ B cells [%]                                         | 2.00±0.46                 | 1.84<br>(0.97-2.94)  | 3.27±0.47                | 3.35<br>(2.27-4.01)   | 0.000*  |
| CD4+TLR-8+ T cells [%]                                          | 2.85±0.86                 | 2.73<br>(1.58-4.76)  | 4.80±0.80                | 5.04<br>(2.98-5.99)   | 0.000*  |
| CD8+TLR-8+ T cells [%]                                          | 1.45±0.71                 | 1.29<br>(0.10-3.00)  | 2.72±0.74                | 2.67<br>(1.36-4.08)   | 0.000*  |
| CD19+TLR-8+ B cells [%]                                         | 1.66±0.72                 | 1.49<br>(0.72-3.17)  | 2.88±0.74                | 2.98<br>(1.20-4.21)   | 0.000*  |
| CD4+TLR-9+ T cells [%]                                          | 5.08±3.07                 | 4.37<br>(1.43-14.89) | 8.70±5.24                | 6.41<br>(2.65-21.30)  | 0.000*  |
| CD8+TLR-9+ T cells [%]                                          | 5.99±3.01                 | 5.17<br>(0.84-14.83) | 9.53±3.79                | 8.85<br>(4.17-20.59)  | 0.000*  |
| CD19+TLR-9+ B cells [%]                                         | 8.17±6.08                 | 5.99<br>(1.24-25.02) | 14.53±7.56               | 11.59<br>(6.50-38.17) | 0.000*  |
| The concentration of the soluble form of TLR-2 in serum [ng/mL] | 6.69±4.66                 | 4.95<br>(1.43-19.25) | 11.97±8.12               | 8.98<br>(1.17-28.46)  | 0.000*  |
| The concentration of the soluble form of TLR-3 in serum [ng/mL] | 6.39±1.69                 | 5.70<br>(5.00-12.68) | 10.25±2.73               | 9.16<br>(7.49-17.48)  | 0.000*  |

|                                                                 |           |                      |            |                       |        |
|-----------------------------------------------------------------|-----------|----------------------|------------|-----------------------|--------|
| The concentration of the soluble form of TLR-4 in serum [ng/mL] | 6.45±3.44 | 5.48<br>(2.23-15.88) | 10.55±4.86 | 8.26<br>(4.03-23.57)  | 0.000* |
| The concentration of the soluble form of TLR-7 in serum [ng/mL] | 5.04±1.61 | 4.53<br>(3.62-11.00) | 8.04±2.33  | 7.41<br>(5.75-14.86)  | 0.000* |
| The concentration of the soluble form of TLR-8 in serum [ng/mL] | 6.32±1.74 | 6.40<br>(3.64-13.22) | 10.31±2.21 | 9.96<br>(5.99-17.04)  | 0.000* |
| The concentration of the soluble form of TLR-9 in serum [ng/mL] | 8.75±5.54 | 8.14<br>(2.09-21.33) | 15.42±7.86 | 14.04<br>(1.30-31.70) | 0.000* |

**Supplementary Materials Table S3.** Selected parameters of morphology, biochemistry and immunophenotype of NSCLC patients after two years of observation, taking into account their survival status

| Parameters                                    | Patients with NSCLC alive |                          | Patients with NSCLC dead |                           | p-value |
|-----------------------------------------------|---------------------------|--------------------------|--------------------------|---------------------------|---------|
|                                               | Mean±SD                   | Median<br>(Range)        | Mean±SD                  | Median<br>(Range)         |         |
| WBC [10 <sup>3</sup> /mm <sup>3</sup> ]       | 7.31± 1.77                | 7.13<br>(4.10-11.79)     | 10.47± 3.59              | 9.55<br>(5.44-24.73)      | 0.000*  |
| LYM [10 <sup>3</sup> /mm <sup>3</sup> ]       | 1.46± 0.56                | 1.31<br>(0.63-2.99)      | 1.85± 0.87               | 1.69<br>(0.44-4.60)       | 0.02*   |
| MON [10 <sup>3</sup> /mm <sup>3</sup> ]       | 0.61± 0.21                | 0.57<br>(0.27-1.36)      | 0.83± 0.29               | 0.76<br>(0.43-1.65)       | 0.000*  |
| NEU [10 <sup>3</sup> /mm <sup>3</sup> ]       | 4.73± 1.41                | 4.72<br>(2.50-9.22)      | 7.49± 3.32               | 6.70<br>(3.54-21.70)      | 0.000*  |
| RBC [10 <sup>6</sup> /mm <sup>3</sup> ]       | 3.60± 0.34                | 3.66<br>(2.57-4.29)      | 4.54± 0.49               | 4.56<br>(3.60-5.36)       | 0.000*  |
| HGB [g/dl]                                    | 10.60± 1.25               | 10.73<br>(7.80-13.81)    | 13.03± 1.71              | 12.90<br>(9.20-16.70)     | 0.000*  |
| PLT [10 <sup>3</sup> /mm <sup>3</sup> ]       | 242.65±<br>94.96          | 222.69<br>(96.72-620.10) | 351.19± 93.20            | 347.00<br>(164.00-577.00) | 0.000*  |
| CRP                                           | 16.07± 20.22              | 11.66<br>(0.58-123.46)   | 31.45± 31.16             | 21.54<br>(0.73-134.43)    | 0.000*  |
| CD3+ T cells [%]                              | 55.60±7.90                | 54.56<br>(35.25-71.74)   | 69.01±14.25              | 70.17<br>(20.40-76.80)    | 0.000*  |
| CD3+CD8+ T cells [%]                          | 23.37±7.94                | 21.98<br>(11.30-45.80)   | 29.98±11.61              | 30.21<br>(8.95-57.23)     | 0.000*  |
| CD3+CD4+ T cells [%]                          | 31.42±6.59                | 31.98<br>(20.12-43.27)   | 37.95±10.37              | 37.80<br>(10.37-57.00)    | 0.000*  |
| Ratio of CD3+CD4+ T cells to CD3+CD8+ T cells | 1.38±1.32                 | 1.24<br>(0.36-9.61)      | 1.53±1.01                | 1.27<br>(0.51-5.58)       | 0.33    |
| CD19+ B cells [%]                             | 6.12±3.19                 | 5.77<br>(1.29-15.97)     | 9.62±7.48                | 8.32<br>(1.92-17.00)      | 0.02*   |

**Supplementary Materials Table S4.** Analysis of the percentage of TLRs tested on selected subpopulations of peripheral blood lymphocytes and their serum concentration in NSCLC patients after two years of observation, taking into account their survival status

| Parameters                                                      | Patients with NSCLC alive |                      | Patients with NSCLC dead |                       | p-value |
|-----------------------------------------------------------------|---------------------------|----------------------|--------------------------|-----------------------|---------|
|                                                                 | Mean±SD                   | Median (Range)       | Mean±SD                  | Median (Range)        |         |
| CD4+TLR-2+ T cells [%]                                          | 3.74±2.94                 | 2.85<br>(1.05-16.03) | 7.31±4.08                | 6.67<br>(2.10-21.02)  | 0.000*  |
| CD8+TLR-2+ T cells [%]                                          | 5.79±3.32                 | 4.47<br>(1.72-14.37) | 9.27±4.46                | 8.56<br>(3.17-21.93)  | 0.000*  |
| CD19+TLR-2+ B cells [%]                                         | 6.26±3.49                 | 5.00<br>(1.04-14.10) | 9.02±4.38                | 6.74<br>(3.96-17.63)  | 0.000*  |
| CD4+TLR-3+ T cells [%]                                          | 1.93±0.69                 | 1.86<br>(0.84-3.83)  | 3.12±0.79                | 2.93<br>(1.98-4.85)   | 0.000*  |
| CD8+TLR-3+ T cells [%]                                          | 1.66±0.51                 | 1.69<br>(0.62-2.81)  | 2.92±0.57                | 2.96<br>(1.64-3.98)   | 0.000*  |
| CD19+TLR-3+ B cells [%]                                         | 1.89±0.63                 | 1.77<br>(0.79-3.44)  | 3.29±0.56                | 3.28<br>(2.12-4.41)   | 0.000*  |
| CD4+TLR-4+ T cells [%]                                          | 5.25±2.53                 | 4.33<br>(1.91-11.72) | 8.21±3.63                | 6.95<br>(4.16-17.39)  | 0.000*  |
| CD8+TLR-4+ T cells [%]                                          | 5.61±2.47                 | 5.54<br>(1.68-13.29) | 10.14±4.36               | 8.06<br>(4.65-18.80)  | 0.000*  |
| CD19+TLR-4+ B cells [%]                                         | 5.66±2.83                 | 5.00<br>(2.82-18.92) | 8.88±4.97                | 6.82<br>(3.81-25.13)  | 0.000*  |
| CD4+TLR-7+ T cells [%]                                          | 1.37±0.42                 | 1.31<br>(0.80-2.71)  | 2.28±0.40                | 2.27<br>(1.42-2.97)   | 0.000*  |
| CD8+TLR-7+ T cells [%]                                          | 1.82±0.64                 | 1.68<br>(0.83-3.42)  | 2.86±0.60                | 2.78<br>(1.22-4.47)   | 0.000*  |
| CD19+TLR-7+ B cells [%]                                         | 2.02±0.43                 | 1.96<br>(1.07-3.10)  | 3.23±0.46                | 3.28<br>(2.24-4.01)   | 0.000*  |
| CD4+TLR-8+ T cells [%]                                          | 2.81±0.84                 | 2.52<br>(1.74-5.02)  | 4.76±0.78                | 4.91<br>(2.96-5.99)   | 0.000*  |
| CD8+TLR-8+ T cells [%]                                          | 1.36±0.71                 | 1.29<br>(0.11-3.17)  | 2.69±0.73                | 2.65<br>(1.30-4.08)   | 0.000*  |
| CD19+TLR-8+ B cells [%]                                         | 1.59±0.72                 | 1.52<br>(0.80-3.34)  | 2.89±0.73                | 2.92<br>(1.20-4.21)   | 0.000*  |
| CD4+TLR-9+ T cells [%]                                          | 5.19±3.25                 | 4.78<br>(1.58-16.36) | 8.34±4.80                | 7.16<br>(2.60-21.30)  | 0.000*  |
| CD8+TLR-9+ T cells [%]                                          | 6.02±2.94                 | 5.55<br>(0.92-15.63) | 9.56±4.10                | 8.85<br>(3.79-20.59)  | 0.000*  |
| CD19+TLR-9+ B cells [%]                                         | 7.59±5.41                 | 6.45<br>(1.36-26.37) | 14.75±8.62               | 11.54<br>(6.50-38.17) | 0.000*  |
| The concentration of the soluble form of TLR-2 in serum [ng/mL] | 6.43±3.89                 | 5.48<br>(1.58-20.30) | 11.85±8.22               | 8.98<br>(1.17-28.46)  | 0.000*  |
| The concentration of the soluble form of TLR-3 in serum [ng/mL] | 6.59±1.75                 | 6.09<br>(5.49-13.36) | 10.00±2.41               | 9.08<br>(7.48-17.48)  | 0.000*  |

|                                                                 |           |                      |            |                       |        |
|-----------------------------------------------------------------|-----------|----------------------|------------|-----------------------|--------|
| The concentration of the soluble form of TLR-4 in serum [ng/mL] | 6.04±3.05 | 5.57<br>(2.45-14.17) | 11.03±4.98 | 8.81<br>(4.03-23.57)  | 0.000* |
| The concentration of the soluble form of TLR-7 in serum [ng/mL] | 5.28±1.87 | 4.78<br>(3.98-11.59) | 7.75±1.92  | 7.39<br>(5.71-14.86)  | 0.000* |
| The concentration of the soluble form of TLR-8 in serum [ng/mL] | 6.50±1.95 | 6.43<br>(4.00-13.93) | 10.03±1.84 | 9.72<br>(5.99-17.04)  | 0.000* |
| The concentration of the soluble form of TLR-9 in serum [ng/mL] | 8.75±5.26 | 8.88<br>(2.29-22.49) | 14.89±8.34 | 14.04<br>(1.30-31.70) | 0.000* |

**Supplementary Materials Table S5.** Selected parameters of morphology, biochemistry and immunophenotype of NSCLC patients after three years of observation, taking into account their survival status

| Parameters                                        | Patients with NSCLC alive |                           | Patients with NSCLC dead |                           | p-value |
|---------------------------------------------------|---------------------------|---------------------------|--------------------------|---------------------------|---------|
|                                                   | Mean±SD                   | Median<br>(Range)         | Mean±SD                  | Median<br>(Range)         |         |
| WBC [10 <sup>3</sup> /mm <sup>3</sup> ]           | 7.33± 1.73                | 7.12<br>(4.45- 10.36)     | 10.03± 3.27              | 9.31<br>(5.26-24.73)      | 0.00*   |
| LYM [10 <sup>3</sup> /mm <sup>3</sup> ]           | 1.69± 0.62                | 1.61<br>(0.83-3.10)       | 1.77± 0.79               | 1.62<br>(0.44-4.60)       | 0.607   |
| MON [10 <sup>3</sup> /mm <sup>3</sup> ]           | 0.64± 0.23                | 0.60<br>(0.28-1.41)       | 0.82± 0.27               | 0.76<br>(0.41-1.65)       | 0.03*   |
| NEU [10 <sup>3</sup> /mm <sup>3</sup> ]           | 4.78 ±1.43                | 4.78<br>(2.60-7.81)       | 7.17± 2.97               | 6.51<br>(3.48-21.70)      | 0.01*   |
| RBC [10 <sup>6</sup> /mm <sup>3</sup> ]           | 3.81± 0.39                | 3.93<br>(2.67-4.46)       | 4.55± 0.46               | 4.63<br>(3.60- 5.36)      | 0.07    |
| HGB [g/dl]                                        | 11.31± 1.48               | 11.30<br>(8.10-14.34)     | 13.11± 1.57              | 13.25<br>(9.20-16.70)     | 0.029   |
| PLT [10 <sup>3</sup> /mm <sup>3</sup> ]           | 264.01±106.35             | 241.79<br>(117.45-643.95) | 336.45± 104.68           | 329.50<br>(124.00-577.00) | 0.01*   |
| CRP                                               | 12.55± 12.74              | 8.77<br>(0.60-52.20)      | 30.47±32.04              | 18.98<br>(0.73-134.43)    | 0.094   |
| CD3+ T cells [%]                                  | 59.05±8.10                | 48.08<br>(24.55-77.22)    | 68.87±12.93              | 69.94<br>(20.40-76.8)     | 0.02*   |
| CD3+CD8+ T cells [%]                              | 57.61±48.61               | 24.24<br>(12.01-41.25)    | 30.01±11.66              | 30.02<br>(8.95-58.72)     | 0.02*   |
| CD3+CD4+ T cells [%]                              | 33.55±6.94                | 34.74<br>(20.89-46.00)    | 38.36±9.64               | 38.39<br>(10.37-57.00)    | 0.098   |
| The ratio of CD3+CD4+ T cells to CD3+CD8+ T cells | 1.26±0.56                 | 1.14<br>(0.53-2.95)       | 1.71±1.62                | 1.31<br>(0.46-5.58)       | 0.018   |
| CD19+ B cells [%]                                 | 6.49±2.83                 | 6.29                      | 8.18±4.97                | 6.80                      | 0.094   |

|  |  |              |  |             |  |
|--|--|--------------|--|-------------|--|
|  |  | (1.34-14.73) |  | (1.92-17.0) |  |
|--|--|--------------|--|-------------|--|

**Supplementary Materials Table S6.** Analysis of the percentage of TLRs tested on selected subpopulations of peripheral blood lymphocytes and their serum concentration in NSCLC patients after three years of observation, taking into account their survival status

| Parameters                                                  | Patients with NSCLC alive |                      | Patients with NSCLC dead |                       | p-value |
|-------------------------------------------------------------|---------------------------|----------------------|--------------------------|-----------------------|---------|
|                                                             | Mean±SD                   | Median (Range)       | Mean±SD                  | Median (Range)        |         |
| CD4+TLR-2+ T cells [%]                                      | 2.57±0.76                 | 2.43<br>(1.15-4.20)  | 7.29±4.31                | 5.72<br>(2.10-21.02)  | 0.02*   |
| CD8+TLR-2+ T cells [%]                                      | 5.12±3.16                 | 4.05<br>(1.90-12.67) | 9.23±4.34                | 8.46<br>(3.17-21.93)  | 0.02*   |
| CD19+TLR-2+ B cells [%]                                     | 5.45±3.01                 | 4.71<br>(1.14-12.29) | 9.32±4.47                | 7.30<br>(3.96-18.08)  | 0.254   |
| CD4+TLR-3+ T cells [%]                                      | 1.68±0.45                 | 1.62<br>(0.93-2.53)  | 3.12±0.82                | 2.87<br>(1.95-4.91)   | 0.000*  |
| CD8+TLR-3+ T cells [%]                                      | 1.43±0.41                 | 1.59<br>(0.68-2.12)  | 2.85±0.53                | 2.84<br>(1.64-3.98)   | 0.000*  |
| CD19+TLR-3+ B cells [%]                                     | 1.56±0.35                 | 1.72<br>(0.87-2.14)  | 3.25±0.58                | 3.21<br>(2.12-4.41)   | 0.000*  |
| CD4+TLR-4+ T cells [%]                                      | 4.98±2.49                 | 4.42<br>(2.06-10.79) | 8.04±3.49                | 6.84<br>(4.16-17.39)  | 0.104   |
| CD8+TLR-4+ T cells [%]                                      | 5.17±2.06                 | 5.36<br>(1.86-9.25)  | 9.63±4.16                | 7.96<br>(3.63-18.80)  | 0.07    |
| CD19+TLR-4+ B cells [%]                                     | 5.28±1.99                 | 4.64<br>(2.92-10.55) | 8.75±4.83                | 6.95<br>(3.79-25.13)  | 0.01*   |
| CD4+TLR-7+ T cells [%]                                      | 1.17±0.21                 | 1.18<br>(0.89-1.54)  | 2.26±0.43                | 2.20<br>(1.42-3.48)   | 0.000*  |
| CD8+TLR-7+ T cells [%]                                      | 1.49±0.37                 | 1.51<br>(0.86-2.64)  | 2.93±0.60                | 2.88<br>(1.22-4.47)   | 0.03*   |
| CD19+TLR-7+ B cells [%]                                     | 1.84±0.18                 | 1.81<br>(1.18-2.22)  | 3.19±0.47                | 3.23<br>(2.24-4.01)   | 0.000*  |
| CD4+TLR-8+ T cells [%]                                      | 2.37±0.30                 | 2.31<br>(1.92-3.23)  | 4.73±0.82                | 4.79<br>(2.96-6.43)   | 0.000*  |
| CD8+TLR-8+ T cells [%]                                      | 0.96±0.37                 | 1.04<br>(0.12-1.60)  | 2.65±0.74                | 2.47<br>(1.30-4.08)   | 0.000*  |
| CD19+TLR-8+ B cells [%]                                     | 1.18±0.31                 | 1.04<br>(0.88-1.87)  | 2.90±0.74                | 2.84<br>(1.20-4.28)   | 0.000*  |
| CD4+TLR-9+ T cells [%]                                      | 4.74±2.39                 | 4.94<br>(1.74-14.39) | 8.21±4.90                | 7.12<br>(2.60-21.30)  | 0.62    |
| CD8+TLR-9+ T cells [%]                                      | 5.41±2.44                 | 5.39<br>(0.96-9.91)  | 9.48±4.08                | 8.30<br>(3.79-20.59)  | 0.34    |
| CD19+TLR-9+ B cells [%]                                     | 5.71±3.36                 | 5.67<br>(1.41-17.22) | 14.45±8.41               | 11.47<br>(5.52-38.17) | 0.60    |
| Concentration of the soluble form of TLR-2 in serum [ng/mL] | 5.62±3.01                 | 5.38<br>(1.64-15.63) | 11.37±7.54               | 9.14<br>(1.17-28.46)  | 0.66    |

|                                                                 |           |                      |            |                       |        |
|-----------------------------------------------------------------|-----------|----------------------|------------|-----------------------|--------|
| The concentration of the soluble form of TLR-3 in serum [ng/mL] | 6.11±0.20 | 6.12<br>(5.80-6.55)  | 9.98±2.56  | 8.95<br>(7.48-17.48)  | 0.000* |
| The concentration of the soluble form of TLR-4 in serum [ng/mL] | 4.86±1.67 | 4.11<br>(2.54-10.36) | 10.85±4.78 | 8.72<br>(4.03-23.57)  | 0.11   |
| The concentration of the soluble form of TLR-7 in serum [ng/mL] | 4.62±0.29 | 4.52<br>(4.24-5.30)  | 7.96±2.32  | 7.34<br>(5.71-14.86)  | 0.000* |
| The concentration of the soluble form of TLR-8 in serum [ng/mL] | 5.82±1.17 | 5.52<br>(4.16-9.42)  | 10.06±2.09 | 9.54<br>(5.99-17.86)  | 0.04*  |
| The concentration of the soluble form of TLR-9 in serum [ng/mL] | 7.61±4.30 | 6.17<br>(2.53-16.09) | 14.62±8.06 | 14.07<br>(1.30-31.70) | 0.09   |

**Supplementary Materials Table S7.** Selected parameters of morphology, biochemistry and immunophenotype of NSCLC patients after four years of observation, taking into account their survival status

| Parameters                              | Patients with NSCLC alive |                           | Patients with NSCLC dead |                           | p-value |
|-----------------------------------------|---------------------------|---------------------------|--------------------------|---------------------------|---------|
|                                         | Mean±SD                   | Median<br>(Range)         | Mean±SD                  | Median<br>(Range)         |         |
| WBC [10 <sup>3</sup> /mm <sup>3</sup> ] | 8.04± 1.90                | 7.88<br>(4.78-11.13)      | 9.95± 3.25               | 9.25<br>(5.26-24.73)      | 0.000*  |
| LYM [10 <sup>3</sup> /mm <sup>3</sup> ] | 1.84± 0.72                | 1.64<br>(0.90-3.60)       | 1.79± 0.78               | 1.62<br>(0.44-4.60)       | 0.78    |
| MON [10 <sup>3</sup> /mm <sup>3</sup> ] | 0.68± 0.19                | 0.66<br>(0.30-1.17)       | 0.82± 0.30               | 0.76<br>(0.41-1.74)       | 0.02*   |
| NEU [10 <sup>3</sup> /mm <sup>3</sup> ] | 5.29± 1.57                | 5.38<br>(2.79-8.39)       | 7.06± 2.96               | 6.39<br>(3.48-21.70)      | 0.000*  |
| RBC [10 <sup>6</sup> /mm <sup>3</sup> ] | 4.12± 0.46                | 4.25<br>(2.87-5.17)       | 4.57± 0.47               | 4.67<br>(3.60-5.36)       | 0.000*  |
| HGB [g/dl]                              | 12.25± 1.79               | 12.09<br>(8.70-16.64)     | 13.17± 1.58              | 13.30<br>(9.20-16.70)     | 0.000*  |
| PLT [10 <sup>3</sup> /mm <sup>3</sup> ] | 281.40±99.83              | 266.22<br>(126.15-491.00) | 339.32±112.85            | 325.00<br>(124.00-674.00) | 0.000*  |
| CRP                                     | 11.97±13.21               | 6.64<br>(0.64-56.07)      | 30.47±31.64              | 21.54<br>(0.73-134.43)    | 0.000*  |
| CD3+ T cells [%]                        | 63.39±8.51                | 61.58<br>(52.21-80.02)    | 68.37±12.06              | 70.12<br>(20.40-85.44)    | 0.000*  |
| CD3+CD8+ T cells [%]                    | 27.16±7.96                | 27.29<br>(14.20-45.08)    | 29.83±11.70              | 29.82<br>(8.95-58.72)     | 0.31    |
| CD3+CD4+ T cells [%]                    | 35.63±7.61                | 35.44<br>(22.44-52.01)    | 38.85±9.79               | 39.66<br>(10.37-57.00)    | 0.08    |

|                                                   |           |                      |           |                      |       |
|---------------------------------------------------|-----------|----------------------|-----------|----------------------|-------|
| The ratio of CD3+CD4+ T cells to CD3+CD8+ T cells | 1.30±0.51 | 1.19<br>(0.58-5.58)  | 1.58±0.93 | 1.33<br>(0.46-5.58)  | 0.289 |
| CD19+ B cells [%]                                 | 6.89±3.14 | 6.68<br>(1.44-15.83) | 8.35±4.98 | 7.34<br>(1.92-21.41) | 0.46  |

**Supplementary Materials Table S8.** Analysis of the percentage of TLRs tested on selected subpopulations of peripheral blood lymphocytes and their serum concentration in NSCLC patients after four years of observation, taking into account their survival status

| Parameters              | Patients with NSCLC alive |                      | Patients with NSCLC dead |                      | p-value |
|-------------------------|---------------------------|----------------------|--------------------------|----------------------|---------|
|                         | Mean±SD                   | Median<br>(Range)    | Mean±SD                  | Median<br>(Range)    |         |
| CD4+TLR-2+ T cells [%]  | 2.78±0.91                 | 2.60<br>(1.26-4.88)  | 7.11±4.32                | 5.66<br>(2.10-21.02) | 0.000*  |
| CD8+TLR-2+ T cells [%]  | 5.72±3.53                 | 4.36<br>(2.08-13.61) | 9.02±4.38                | 8.33<br>(3.17-21.93) | 0.000*  |
| CD19+TLR-2+ B cells [%] | 5.99±3.39                 | 4.80<br>(1.25-13.20) | 9.16±4.46                | 7.01<br>(3.96-18.08) | 0.000*  |
| CD4+TLR-3+ T cells [%]  | 1.78±0.48                 | 1.67<br>(1.02-2.76)  | 3.08±0.83                | 2.81<br>(1.95-4.91)  | 0.000*  |
| CD8+TLR-3+ T cells [%]  | 1.50±0.44                 | 1.67<br>(0.74-2.28)  | 2.82±0.54                | 2.77<br>(1.64-3.98)  | 0.000*  |
| CD19+TLR-3+ B cells [%] | 1.65±0.36                 | 1.82<br>(0.95-2.29)  | 3.21±0.60                | 3.19<br>(2.12-4.41)  | 0.000*  |
| CD4+TLR-4+ T cells [%]  | 5.48±2.77                 | 4.73<br>(2.30-11.59) | 7.91±3.50                | 6.72<br>(3.62-17.39) | 0.000*  |
| CD8+TLR-4+ T cells [%]  | 5.46±2.18                 | 5.66<br>(2.03-9.94)  | 9.54±4.15                | 8.06<br>(3.63-18.80) | 0.000*  |
| CD19+TLR-4+ B cells [%] | 5.76±2.25                 | 4.90<br>(3.14-11.34) | 8.62±4.79                | 6.82<br>(3.79-25.13) | 0.000*  |
| CD4+TLR-7+ T cells [%]  | 1.24±0.21                 | 1.25<br>(0.97-1.65)  | 2.24±0.44                | 2.19<br>(1.42-3.48)  | 0.000*  |
| CD8+TLR-7+ T cells [%]  | 1.58±0.40                 | 1.61<br>(0.92-2.84)  | 2.90±0.61                | 2.79<br>(1.22-4.47)  | 0.000*  |
| CD19+TLR-7+ B cells [%] | 1.98±0.19                 | 1.99<br>(1.29-2.38)  | 3.16±0.48                | 3.22<br>(2.24-4.01)  | 0.000*  |
| CD4+TLR-8+ T cells [%]  | 2.54±0.31                 | 2.44<br>(2.10-3.47)  | 4.66±0.86                | 4.76<br>(2.96-6.43)  | 0.000*  |
| CD8+TLR-8+ T cells [%]  | 0.99±0.39                 | 1.04<br>(0.13-1.71)  | 2.60±0.75                | 2.40<br>(1.30-4.08)  | 0.000*  |
| CD19+TLR-8+ B cells [%] | 1.23±0.31                 | 1.07<br>(0.96-2.01)  | 2.85±0.75                | 2.83<br>(1.20-4.28)  | 0.000*  |
| CD4+TLR-9+ T cells [%]  | 5.00±2.67                 | 5.15<br>(1.90-15.45) | 8.16±4.84                | 7.16<br>(2.60-21.30) | 0.000*  |
| CD8+TLR-9+ T cells [%]  | 5.57±2.54                 | 5.56<br>(1.03-9.87)  | 9.48±4.04                | 8.44<br>(3.79-20.59) | 0.000*  |



|                                                                 |           |                      |            |                       |        |
|-----------------------------------------------------------------|-----------|----------------------|------------|-----------------------|--------|
| CD19+TLR-9+ B cells [%]                                         | 5.99±3.74 | 4.67<br>(1.51-18.50) | 14.18±8.37 | 11.15<br>(5.52-38.17) | 0.000* |
| Concentration of the soluble form of TLR-2 in serum [ng/mL]     | 6.09±3.59 | 5.67<br>(1.76-18.14) | 11.18±7.47 | 8.51<br>(1.17-28.46)  | 0.000* |
| The concentration of the soluble form of TLR-3 in serum [ng/mL] | 6.60±0.20 | 6.62<br>(6.25-7.04)  | 9.88±2.56  | 8.91<br>(7.48-17.48)  | 0.000* |
| The concentration of the soluble form of TLR-4 in serum [ng/mL] | 5.17±1.80 | 4.44<br>(2.73-11.12) | 10.67±4.79 | 8.63<br>(4.03-23.57)  | 0.000* |
| Concentration of the soluble form of TLR-7 in serum [ng/mL]     | 4.96±0.27 | 4.90<br>(4.57-5.69)  | 7.88±2.31  | 7.24<br>(5.71-14.86)  | 0.000* |
| Concentration of the soluble form of TLR-8 in serum [ng/mL]     | 6.21±1.26 | 5.84<br>(4.46-10.12) | 9.97±2.10  | 9.47<br>(5.99-17.86)  | 0.000* |
| Concentration of the soluble form of TLR-9 in serum [ng/mL]     | 6.21±1.26 | 5.84<br>(4.46-10.12) | 14.59±7.95 | 14.04<br>(1.30-31.70) | 0.000* |

**Supplementary Materials Table S9.** Spearman rank correlation analysis for dead NSCLC patients

| Parameter                         | R Spearman | t(N-2) | p-value | Parameter                        | R Spearman | t(N-2) | p-value |
|-----------------------------------|------------|--------|---------|----------------------------------|------------|--------|---------|
| CD8+TLR-2+ [%] & CD8+TLR-9+ [%]   | 0.404      | 3.748  | 0.000*  | CD8+TLR-2+ [%] & CD19+TLR-2+ [%] | 0.655      | 7.351  | 0.000*  |
| CD8+TLR-7+ [%] & sTLR-4 [ng/mL]   | 0.410      | 3.816  | 0.000*  | CD19+TLR-2+ [%] & sTLR-9 [ng/mL] | 0.659      | 7.431  | 0.000*  |
| CD19+TLR-4+ [%] & CD4+TLR-7+ [%]  | 0.411      | 3.826  | 0.000*  | CD8+TLR-4+ [%] & CD19+TLR-9+ [%] | 0.659      | 7.436  | 0.000*  |
| CD8+TLR-2+ [%] & CD19+TLR-9+ [%]  | 0.419      | 3.914  | 0.000*  | CD8+TLR-9+ [%] & sTLR-4 [ng/mL]  | 0.660      | 7.450  | 0.000*  |
| CD19+TLR-4+ [%] & CD4+TLR-8+ [%]  | 0.425      | 3.982  | 0.000*  | CD8+TLR-7+ [%] & sTLR-7 [ng/mL]  | 0.667      | 7.603  | 0.000*  |
| CD4+TLR-3+ [%] & CD8+TLR-4+ [%]   | 0.425      | 3.986  | 0.000*  | CD4+TLR-4+ [%] & CD8+TLR-4+ [%]  | 0.668      | 7.625  | 0.000*  |
| CD4+TLR-3+ [%] & sTLR-4 [ng/mL]   | 0.429      | 4.029  | 0.000*  | CD4+TLR-4+ [%] & sTLR-4 [ng/mL]  | 0.676      | 7.775  | 0.000*  |
| CD19+TLR-3+ [%] & sTLR-4 [ng/mL]  | 0.431      | 4.052  | 0.000*  | CD19+TLR-2+ [%] & sTLR-4 [ng/mL] | 0.678      | 7.823  | 0.000*  |
| CD19+TLR-7+ [%] & sTLR-4 [ng/mL]  | 0.432      | 4.065  | 0.000*  | CD19+TLR-8+ [%] & sTLR-8 [ng/mL] | 0.678      | 7.834  | 0.000*  |
| CD19+TLR-2+ [%] & CD8+TLR-7+ [%]  | 0.435      | 4.100  | 0.000*  | CD19+TLR-9+ [%] & sTLR-4 [ng/mL] | 0.680      | 7.874  | 0.000*  |
| CD19+TLR-2+ [%] & CD4+TLR-7+ [%]  | 0.437      | 4.122  | 0.000*  | CD8+TLR-2+ [%] & CD4+TLR-8+ [%]  | 0.681      | 7.885  | 0.000*  |
| CD19+TLR-2+ [%] & sTLR-7 [ng/mL]  | 0.438      | 4.130  | 0.000*  | CD19+TLR-2+ [%] & sTLR-2 [ng/mL] | 0.691      | 8.109  | 0.000*  |
| CD19+TLR-2+ [%] & CD19+TLR-8+ [%] | 0.440      | 4.157  | 0.000*  | CD8+TLR-2+ [%] & CD8+TLR-7+ [%]  | 0.695      | 8.199  | 0.000*  |
| CD19+TLR-4+ [%] & CD8+TLR-7+ [%]  | 0.440      | 4.159  | 0.000*  | CD8+TLR-2+ [%] & sTLR-7 [ng/mL]  | 0.709      | 8.524  | 0.000*  |

|                                   |       |       |        |                                  |       |        |        |
|-----------------------------------|-------|-------|--------|----------------------------------|-------|--------|--------|
| CD4+TLR-4+ [%] & CD19+TLR-8+ [%]  | 0.441 | 4.171 | 0.000* | CD8+TLR-2+ [%] & CD4+TLR-4+ [%]  | 0.710 | 8.555  | 0.000* |
| CD4+TLR-4+ [%] & CD4+TLR-7+ [%]   | 0.444 | 4.201 | 0.000* | CD4+TLR-3+ [%] & CD19+TLR-8+ [%] | 0.714 | 8.644  | 0.000* |
| CD19+TLR-2+ [%] & CD4+TLR-8+ [%]  | 0.444 | 4.205 | 0.000* | CD8+TLR-2+ [%] & CD8+TLR-8+ [%]  | 0.717 | 8.719  | 0.000* |
| CD19+TLR-2+ [%] & sTLR-8 [ng/mL]  | 0.445 | 4.211 | 0.000* | CD8+TLR-2+ [%] & CD19+TLR-7+ [%] | 0.717 | 8.726  | 0.000* |
| CD8+TLR-3+ [%] & sTLR-8 [ng/mL]   | 0.446 | 4.225 | 0.000* | CD8+TLR-2+ [%] & sTLR-3 [ng/mL]  | 0.718 | 8.741  | 0.000* |
| CD19+TLR-4+ [%] & CD8+TLR-8+ [%]  | 0.447 | 4.237 | 0.000* | CD8+TLR-2+ [%] & CD19+TLR-3+ [%] | 0.718 | 8.741  | 0.000* |
| CD4+TLR-4+ [%] & sTLR-7 [ng/mL]   | 0.448 | 4.247 | 0.000* | CD4+TLR-2+ [%] & sTLR-8 [ng/mL]  | 0.723 | 8.869  | 0.000* |
| CD8+TLR-8+ [%] & sTLR-4 [ng/mL]   | 0.448 | 4.247 | 0.000* | CD4+TLR-3+ [%] & CD4+TLR-7+ [%]  | 0.724 | 8.894  | 0.000* |
| CD4+TLR-4+ [%] & CD19+TLR-4+ [%]  | 0.453 | 4.310 | 0.000* | CD19+TLR-2+ [%] & CD4+TLR-4+ [%] | 0.729 | 9.028  | 0.000* |
| CD4+TLR-3+ [%] & CD8+TLR-3+ [%]   | 0.454 | 4.325 | 0.000* | CD8+TLR-4+ [%] & CD8+TLR-9+ [%]  | 0.731 | 9.080  | 0.000* |
| CD4+TLR-4+ [%] & CD19+TLR-9+ [%]  | 0.459 | 4.384 | 0.000* | CD19+TLR-9+ [%] & sTLR-2 [ng/mL] | 0.733 | 9.138  | 0.000* |
| CD8+TLR-2+ [%] & sTLR-2 [ng/mL]   | 0.459 | 4.388 | 0.000* | CD4+TLR-8+ [%] & sTLR-8 [ng/mL]  | 0.737 | 9.249  | 0.000* |
| CD4+TLR-3+ [%] & CD8+TLR-9+ [%]   | 0.461 | 4.412 | 0.000* | CD4+TLR-7+ [%] & sTLR-8 [ng/mL]  | 0.747 | 9.547  | 0.000* |
| CD8+TLR-2+ [%] & CD19+TLR-4+ [%]  | 0.464 | 4.440 | 0.000* | CD4+TLR-3+ [%] & CD4+TLR-8+ [%]  | 0.749 | 9.587  | 0.000* |
| CD19+TLR-3+ [%] & CD19+TLR-4+ [%] | 0.464 | 4.442 | 0.000* | CD4+TLR-9+ [%] & sTLR-4 [ng/mL]  | 0.749 | 9.604  | 0.000* |
| CD19+TLR-4+ [%] & sTLR-7 [ng/mL]  | 0.464 | 4.447 | 0.000* | CD8+TLR-4+ [%] & sTLR-9 [ng/mL]  | 0.758 | 9.865  | 0.000* |
| CD19+TLR-4+ [%] & CD19+TLR-7+ [%] | 0.464 | 4.450 | 0.000* | CD4+TLR-3+ [%] & CD8+TLR-8+ [%]  | 0.764 | 10.057 | 0.000* |
| CD19+TLR-4+ [%] & sTLR-3 [ng/mL]  | 0.466 | 4.468 | 0.000* | CD4+TLR-2+ [%] & CD19+TLR-8+ [%] | 0.766 | 10.098 | 0.000* |
| CD4+TLR-4+ [%] & CD4+TLR-8+ [%]   | 0.472 | 4.546 | 0.000* | CD4+TLR-3+ [%] & sTLR-7 [ng/mL]  | 0.766 | 10.102 | 0.000* |
| CD4+TLR-3+ [%] & CD4+TLR-4+ [%]   | 0.475 | 4.582 | 0.000* | CD8+TLR-4+ [%] & CD4+TLR-9+ [%]  | 0.774 | 10.368 | 0.000* |
| CD4+TLR-2+ [%] & sTLR-4 [ng/mL]   | 0.482 | 4.669 | 0.000* | CD19+TLR-3+ [%] & sTLR-8 [ng/mL] | 0.774 | 10.369 | 0.000* |
| CD19+TLR-2+ [%] & CD8+TLR-8+ [%]  | 0.483 | 4.678 | 0.000* | CD19+TLR-7+ [%] & sTLR-8 [ng/mL] | 0.774 | 10.389 | 0.000* |
| CD4+TLR-2+ [%] & CD19+TLR-2+ [%]  | 0.483 | 4.682 | 0.000* | CD8+TLR-8+ [%] & sTLR-8 [ng/mL]  | 0.775 | 10.419 | 0.000* |
| CD19+TLR-2+ [%] & CD19+TLR-3+ [%] | 0.484 | 4.694 | 0.000* | CD4+TLR-3+ [%] & sTLR-3 [ng/mL]  | 0.781 | 10.616 | 0.000* |
| CD19+TLR-2+ [%] & sTLR-3 [ng/mL]  | 0.485 | 4.704 | 0.000* | CD4+TLR-3+ [%] & CD19+TLR-3+ [%] | 0.781 | 10.624 | 0.000* |
| CD19+TLR-2+ [%] & CD19+TLR-7+ [%] | 0.485 | 4.705 | 0.000* | CD4+TLR-3+ [%] & CD19+TLR-7+ [%] | 0.782 | 10.649 | 0.000* |
| CD19+TLR-2+ [%] & CD4+TLR-3+ [%]  | 0.489 | 4.760 | 0.000* | CD8+TLR-9+ [%] & sTLR-2 [ng/mL]  | 0.802 | 11.398 | 0.000* |
| CD4+TLR-2+ [%] & CD19+TLR-4+ [%]  | 0.493 | 4.805 | 0.000* | CD8+TLR-9+ [%] & CD19+TLR-9+ [%] | 0.806 | 11.556 | 0.000* |

|                                   |       |       |        |                                   |       |        |        |
|-----------------------------------|-------|-------|--------|-----------------------------------|-------|--------|--------|
| CD8+TLR-7+ [%] & sTLR-8 [ng/mL]   | 0.494 | 4.824 | 0.000* | CD4+TLR-2+ [%] & CD4+TLR-7+ [%]   | 0.812 | 11.797 | 0.000* |
| CD19+TLR-3+ [%] & CD4+TLR-4+ [%]  | 0.498 | 4.873 | 0.000* | CD4+TLR-2+ [%] & CD8+TLR-2+ [%]   | 0.812 | 11.798 | 0.000* |
| CD4+TLR-4+ [%] & CD19+TLR-7+ [%]  | 0.498 | 4.874 | 0.000* | CD19+TLR-9+ [%] & sTLR-9 [ng/mL]  | 0.813 | 11.863 | 0.000* |
| CD4+TLR-4+ [%] & sTLR-3 [ng/mL]   | 0.499 | 4.888 | 0.000* | CD8+TLR-4+ [%] & sTLR-2 [ng/mL]   | 0.816 | 11.957 | 0.000* |
| CD4+TLR-4+ [%] & CD8+TLR-8+ [%]   | 0.504 | 4.958 | 0.000* | CD4+TLR-9+ [%] & sTLR-2 [ng/mL]   | 0.816 | 11.989 | 0.000* |
| CD8+TLR-2+ [%] & CD8+TLR-4+ [%]   | 0.510 | 5.035 | 0.000* | CD4+TLR-2+ [%] & sTLR-7 [ng/mL]   | 0.830 | 12.603 | 0.000* |
| CD8+TLR-2+ [%] & CD8+TLR-3+ [%]   | 0.514 | 5.090 | 0.000* | CD4+TLR-2+ [%] & CD4+TLR-8+ [%]   | 0.830 | 12.625 | 0.000* |
| CD4+TLR-4+ [%] & sTLR-9 [ng/mL]   | 0.519 | 5.157 | 0.000* | CD4+TLR-9+ [%] & CD8+TLR-9+ [%]   | 0.833 | 12.799 | 0.000* |
| CD4+TLR-4+ [%] & CD8+TLR-7+ [%]   | 0.521 | 5.184 | 0.000* | CD8+TLR-4+ [%] & sTLR-4 [ng/mL]   | 0.837 | 12.968 | 0.000* |
| CD19+TLR-2+ [%] & CD19+TLR-9+ [%] | 0.523 | 5.206 | 0.000* | CD4+TLR-9+ [%] & CD19+TLR-9+ [%]  | 0.840 | 13.163 | 0.000* |
| CD8+TLR-3+ [%] & CD8+TLR-7+ [%]   | 0.539 | 5.435 | 0.000* | CD8+TLR-9+ [%] & sTLR-9 [ng/mL]   | 0.845 | 13.415 | 0.000* |
| CD4+TLR-7+ [%] & CD8+TLR-7+ [%]   | 0.540 | 5.437 | 0.000* | CD19+TLR-8+ [%] & sTLR-7 [ng/mL]  | 0.856 | 14.027 | 0.000* |
| CD4+TLR-4+ [%] & CD8+TLR-9+ [%]   | 0.544 | 5.502 | 0.000* | CD4+TLR-2+ [%] & CD19+TLR-7+ [%]  | 0.865 | 14.625 | 0.000* |
| CD8+TLR-2+ [%] & CD4+TLR-3+ [%]   | 0.546 | 5.529 | 0.000* | CD4+TLR-2+ [%] & CD19+TLR-3+ [%]  | 0.865 | 14.658 | 0.000* |
| CD8+TLR-3+ [%] & CD19+TLR-8+ [%]  | 0.556 | 5.680 | 0.000* | CD4+TLR-2+ [%] & sTLR-3 [ng/mL]   | 0.865 | 14.661 | 0.000* |
| CD8+TLR-2+ [%] & sTLR-8 [ng/mL]   | 0.559 | 5.721 | 0.000* | CD4+TLR-7+ [%] & CD19+TLR-8+ [%]  | 0.869 | 14.880 | 0.000* |
| CD4+TLR-2+ [%] & CD4+TLR-4+ [%]   | 0.559 | 5.727 | 0.000* | CD4+TLR-2+ [%] & CD8+TLR-8+ [%]   | 0.874 | 15.270 | 0.000* |
| CD8+TLR-7+ [%] & CD19+TLR-8+ [%]  | 0.573 | 5.926 | 0.000* | CD4+TLR-9+ [%] & sTLR-9 [ng/mL]   | 0.887 | 16.297 | 0.000* |
| CD4+TLR-4+ [%] & CD4+TLR-9+ [%]   | 0.576 | 5.977 | 0.000* | CD8+TLR-8+ [%] & CD19+TLR-8+ [%]  | 0.889 | 16.492 | 0.000* |
| CD8+TLR-3+ [%] & CD4+TLR-7+ [%]   | 0.582 | 6.071 | 0.000* | CD19+TLR-7+ [%] & CD19+TLR-8+ [%] | 0.902 | 17.741 | 0.000* |
| CD19+TLR-2+ [%] & CD8+TLR-9+ [%]  | 0.589 | 6.191 | 0.000* | CD19+TLR-8+ [%] & sTLR-3 [ng/mL]  | 0.902 | 17.744 | 0.000* |
| CD4+TLR-2+ [%] & CD8+TLR-3+ [%]   | 0.597 | 6.316 | 0.000* | CD19+TLR-3+ [%] & CD19+TLR-8+ [%] | 0.903 | 17.860 | 0.000* |
| CD8+TLR-7+ [%] & CD4+TLR-8+ [%]   | 0.598 | 6.328 | 0.000* | CD4+TLR-8+ [%] & CD19+TLR-8+ [%]  | 0.909 | 18.534 | 0.000* |
| CD4+TLR-3+ [%] & sTLR-8 [ng/mL]   | 0.599 | 6.348 | 0.000* | CD4+TLR-7+ [%] & sTLR-7 [ng/mL]   | 0.909 | 18.565 | 0.000* |
| CD4+TLR-3+ [%] & CD8+TLR-7+ [%]   | 0.602 | 6.402 | 0.000* | CD4+TLR-8+ [%] & sTLR-7 [ng/mL]   | 0.918 | 19.665 | 0.000* |
| CD4+TLR-4+ [%] & sTLR-2 [ng/mL]   | 0.608 | 6.497 | 0.000* | CD8+TLR-8+ [%] & sTLR-7 [ng/mL]   | 0.944 | 24.160 | 0.000* |
| CD8+TLR-3+ [%] & sTLR-7 [ng/mL]   | 0.609 | 6.517 | 0.000* | CD4+TLR-7+ [%] & CD8+TLR-8+ [%]   | 0.944 | 24.300 | 0.000* |
| CD19+TLR-2+ [%] & CD4+TLR-9+ [%]  | 0.611 | 6.554 | 0.000* | CD19+TLR-7+ [%] & sTLR-7 [ng/mL]  | 0.951 | 26.241 | 0.000* |

|                                  |       |       |        |                                   |       |         |        |
|----------------------------------|-------|-------|--------|-----------------------------------|-------|---------|--------|
| CD8+TLR-3+ [%] & CD4+TLR-8+ [%]  | 0.618 | 6.668 | 0.000* | CD4+TLR-7+ [%] & sTLR-3 [ng/mL]   | 0.952 | 26.297  | 0.000* |
| CD8+TLR-3+ [%] & CD8+TLR-8+ [%]  | 0.627 | 6.832 | 0.000* | CD4+TLR-7+ [%] & CD19+TLR-7+ [%]  | 0.952 | 26.300  | 0.000* |
| CD8+TLR-7+ [%] & CD8+TLR-8+ [%]  | 0.627 | 6.834 | 0.000* | CD19+TLR-3+ [%] & sTLR-7 [ng/mL]  | 0.952 | 26.351  | 0.000* |
| CD8+TLR-3+ [%] & CD19+TLR-7+ [%] | 0.627 | 6.835 | 0.000* | CD19+TLR-3+ [%] & CD4+TLR-7+ [%]  | 0.952 | 26.459  | 0.000* |
| CD8+TLR-3+ [%] & sTLR-3 [ng/mL]  | 0.628 | 6.840 | 0.000* | CD4+TLR-8+ [%] & CD8+TLR-8+ [%]   | 0.958 | 28.199  | 0.000* |
| CD4+TLR-2+ [%] & CD8+TLR-7+ [%]  | 0.628 | 6.851 | 0.000* | CD19+TLR-7+ [%] & CD4+TLR-8+ [%]  | 0.966 | 31.943  | 0.000* |
| CD8+TLR-2+ [%] & sTLR-4 [ng/mL]  | 0.629 | 6.870 | 0.000* | CD4+TLR-8+ [%] & sTLR-3 [ng/mL]   | 0.966 | 31.944  | 0.000* |
| CD8+TLR-3+ [%] & CD19+TLR-3+ [%] | 0.630 | 6.883 | 0.000* | CD19+TLR-3+ [%] & CD4+TLR-8+ [%]  | 0.967 | 32.274  | 0.000* |
| CD4+TLR-2+ [%] & CD4+TLR-3+ [%]  | 0.632 | 6.925 | 0.000* | CD4+TLR-7+ [%] & CD4+TLR-8+ [%]   | 0.972 | 35.248  | 0.000* |
| CD19+TLR-3+ [%] & CD8+TLR-7+ [%] | 0.637 | 7.013 | 0.000* | CD19+TLR-3+ [%] & CD8+TLR-8+ [%]  | 0.991 | 63.032  | 0.000* |
| CD8+TLR-7+ [%] & CD19+TLR-7+ [%] | 0.637 | 7.015 | 0.000* | CD19+TLR-7+ [%] & CD8+TLR-8+ [%]  | 0.991 | 63.461  | 0.000* |
| CD8+TLR-7+ [%] & sTLR-3 [ng/mL]  | 0.637 | 7.015 | 0.000* | CD8+TLR-8+ [%] & sTLR-3 [ng/mL]   | 0.991 | 63.651  | 0.000* |
| CD8+TLR-2+ [%] & CD19+TLR-8+ [%] | 0.639 | 7.042 | 0.000* | CD19+TLR-3+ [%] & sTLR-3 [ng/mL]  | 1.000 | 409.343 | 0.000* |
| CD8+TLR-2+ [%] & CD4+TLR-7+ [%]  | 0.642 | 7.111 | 0.000* | CD19+TLR-3+ [%] & CD19+TLR-7+ [%] | 1.000 | 449.978 | 0.000* |
| CD19+TLR-2+ [%] & CD8+TLR-4+ [%] | 0.654 | 7.328 | 0.000* | CD19+TLR-7+ [%] & sTLR-3 [ng/mL]  | 1.000 | 481.066 | 0.000* |

\* statistically significant results

**Supplementary Materials Table S10.** Spearman rank correlation analysis for alive NSCLC patients

| Parameter                        | R Spearman | t(N-2) | p-value | Parameter                        | R Spearman | t(N-2) | p-value |
|----------------------------------|------------|--------|---------|----------------------------------|------------|--------|---------|
| CD8+TLR-8+ [%] & sTLR-2 [ng/mL]  | -0.821     | -5.384 | 0.000*  | CD4+TLR-9+ [%] & CD8+TLR-2+ [%]  | 0.635      | 3.078  | 0.008*  |
| CD4+TLR-4+ [%] & sTLR-2 [ng/mL]  | -0.771     | -4.524 | 0.000*  | CD4+TLR-9+ [%] & CD8+TLR-7+ [%]  | 0.643      | 3.142  | 0.007*  |
| CD19+TLR-8+ [%] & sTLR-2 [ng/mL] | -0.729     | -3.985 | 0.001*  | CD4+TLR-4+ [%] & CD8+TLR-2+ [%]  | 0.650      | 3.200  | 0.006*  |
| CD19+TLR-7+ [%] & sTLR-2 [ng/mL] | -0.722     | -3.903 | 0.002*  | CD19+TLR-4+ [%] & CD4+TLR-4+ [%] | 0.650      | 3.200  | 0.006*  |
| CD4+TLR-7+ [%] & sTLR-2 [ng/mL]  | -0.704     | -3.709 | 0.002*  | CD8+TLR-8+ [%] & CD4+TLR-4+ [%]  | 0.664      | 3.320  | 0.005*  |
| CD4+TLR-8+ [%] & sTLR-2 [ng/mL]  | -0.704     | -3.709 | 0.002*  | CD4+TLR-4+ [%] & CD19+TLR-2+ [%] | 0.665      | 3.329  | 0.005*  |
| CD19+TLR-3+ [%] & sTLR-2 [ng/mL] | -0.660     | -3.290 | 0.005*  | CD19+TLR-8+ [%] & CD4+TLR-4+ [%] | 0.667      | 3.351  | 0.005*  |
| CD4+TLR-4+ [%] & sTLR-4 [ng/mL]  | -0.553     | -2.483 | 0.026*  | CD8+TLR-4+ [%] & CD8+TLR-2+ [%]  | 0.668      | 3.356  | 0.005*  |
| CD4+TLR-2+ [%] & CD4+TLR-4+ [%]  | -0.531     | -2.346 | 0.034*  | CD8+TLR-7+ [%] & CD19+TLR-2+ [%] | 0.687      | 3.540  | 0.003*  |

|                                   |        |        |        |                                   |       |        |        |
|-----------------------------------|--------|--------|--------|-----------------------------------|-------|--------|--------|
| CD19+TLR-4+ [%] & sTLR-2 [ng/mL]  | -0.529 | -2.335 | 0.035* | CD19+TLR-9+ [%] & CD8+TLR-9+ [%]  | 0.692 | 3.589  | 0.003* |
| CD19+TLR-4+ [%] & CD4+TLR-2+ [%]  | -0.506 | -2.197 | 0.045* | CD19+TLR-2+ [%] & CD8+TLR-2+ [%]  | 0.697 | 3.638  | 0.003* |
| CD19+TLR-3+ [%] & CD4+TLR-8+ [%]  | 0.500  | 2.162  | 0.048* | CD4+TLR-9+ [%] & CD19+TLR-2+ [%]  | 0.703 | 3.698  | 0.002* |
| CD4+TLR-8+ [%] & CD19+TLR-3+ [%]  | 0.500  | 2.162  | 0.048* | CD4+TLR-9+ [%] & CD4+TLR-4+ [%]   | 0.712 | 3.791  | 0.002* |
| CD19+TLR-3+ [%] & sTLR-3 [ng/mL]  | 0.501  | 2.165  | 0.048* | CD8+TLR-9+ [%] & CD8+TLR-2+ [%]   | 0.726 | 3.955  | 0.001* |
| CD19+TLR-4+ [%] & sTLR-7 [ng/mL]  | 0.506  | 2.192  | 0.046* | CD8+TLR-9+ [%] & CD4+TLR-9+ [%]   | 0.729 | 3.990  | 0.001* |
| CD19+TLR-7+ [%] & CD19+TLR-4+ [%] | 0.513  | 2.238  | 0.042* | CD19+TLR-9+ [%] & CD8+TLR-7+ [%]  | 0.749 | 4.226  | 0.001* |
| CD19+TLR-9+ [%] & CD8+TLR-2+ [%]  | 0.515  | 2.251  | 0.041* | CD4+TLR-8+ [%] & CD8+TLR-8+ [%]   | 0.803 | 5.033  | 0.000* |
| CD19+TLR-7+ [%] & CD19+TLR-3+ [%] | 0.517  | 2.262  | 0.040* | CD8+TLR-8+ [%] & CD4+TLR-8+ [%]   | 0.803 | 5.033  | 0.000* |
| CD8+TLR-8+ [%] & CD19+TLR-4+ [%]  | 0.519  | 2.275  | 0.039* | CD8+TLR-7+ [%] & CD8+TLR-2+ [%]   | 0.806 | 5.104  | 0.000* |
| CD19+TLR-3+ [%] & sTLR-7 [ng/mL]  | 0.521  | 2.286  | 0.038* | CD8+TLR-8+ [%] & sTLR-3 [ng/mL]   | 0.807 | 5.114  | 0.000* |
| CD19+TLR-9+ [%] & CD19+TLR-4+ [%] | 0.532  | 2.349  | 0.034* | CD8+TLR-8+ [%] & CD19+TLR-7+ [%]  | 0.810 | 5.164  | 0.000* |
| CD19+TLR-4+ [%] & sTLR-3 [ng/mL]  | 0.534  | 2.365  | 0.033* | CD8+TLR-8+ [%] & sTLR-7 [ng/mL]   | 0.819 | 5.347  | 0.000* |
| CD19+TLR-9+ [%] & CD19+TLR-2+ [%] | 0.536  | 2.376  | 0.032* | CD19+TLR-4+ [%] & CD19+TLR-2+ [%] | 0.838 | 5.752  | 0.000* |
| CD4+TLR-8+ [%] & CD19+TLR-4+ [%]  | 0.539  | 2.395  | 0.031* | CD8+TLR-8+ [%] & CD19+TLR-3+ [%]  | 0.850 | 6.045  | 0.000* |
| CD4+TLR-7+ [%] & CD19+TLR-4+ [%]  | 0.543  | 2.422  | 0.030* | CD19+TLR-8+ [%] & CD8+TLR-8+ [%]  | 0.856 | 6.184  | 0.000* |
| CD19+TLR-4+ [%] & CD8+TLR-2+ [%]  | 0.553  | 2.483  | 0.026* | CD8+TLR-9+ [%] & CD8+TLR-7+ [%]   | 0.857 | 6.209  | 0.000* |
| CD8+TLR-7+ [%] & CD19+TLR-4+ [%]  | 0.553  | 2.486  | 0.026* | CD19+TLR-8+ [%] & CD19+TLR-7+ [%] | 0.956 | 12.129 | 0.000* |
| CD8+TLR-4+ [%] & CD4+TLR-4+ [%]   | 0.562  | 2.541  | 0.024* | CD19+TLR-8+ [%] *-7 [ng/mL]       | 0.962 | 13.114 | 0.000* |
| CD8+TLR-9+ [%] & CD8+TLR-4+ [%]   | 0.562  | 2.541  | 0.024* | CD19+TLR-8+ [%] *& sTLR-3 [ng/mL] | 0.962 | 13.260 | 0.000* |
| CD19+TLR-8+ [%] & CD19+TLR-4+ [%] | 0.571  | 2.605  | 0.021* | CD4+TLR-8+ [%] & *CD19+TLR-8+ [%] | 0.968 | 14.502 | 0.000* |
| CD4+TLR-4+ [%] & sTLR-3 [ng/mL]   | 0.602  | 2.820  | 0.014* | CD19+TLR-8+ [%] & CD4+TLR-8+ [%]  | 0.968 | 14.502 | 0.000* |
| CD4+TLR-4+ [%] & sTLR-7 [ng/mL]   | 0.603  | 2.827  | 0.013* | CD19+TLR-7+ [%] & CD4+TLR-7+ [%]  | 0.991 | 27.891 | 0.000* |
| CD19+TLR-7+ [%] & CD4+TLR-4+ [%]  | 0.607  | 2.854  | 0.013* | CD19+TLR-7+ [%] & sTLR-3 [ng/mL]  | 0.992 | 29.166 | 0.000* |

|                                      |       |       |        |                                     |       |        |        |
|--------------------------------------|-------|-------|--------|-------------------------------------|-------|--------|--------|
| CD4+TLR-4+ [%] &<br>CD4+TLR-8+ [%]   | 0.611 | 2.889 | 0.012* | CD4+TLR-8+ [%] &<br>CD19+TLR-7+ [%] | 0.993 | 32.265 | 0.000* |
| CD4+TLR-8+ [%] &<br>CD4+TLR-4+ [%]   | 0.611 | 2.889 | 0.012* | CD19+TLR-7+ [%] &<br>sTLR-7 [ng/mL] | 0.995 | 36.610 | 0.000* |
| CD19+TLR-9+ [%] &<br>CD4+TLR-9+ [%]  | 0.614 | 2.912 | 0.011* | CD4+TLR-7+ [%] &<br>sTLR-7 [ng/mL]  | 0.995 | 36.669 | 0.000* |
| CD8+TLR-7+ [%] &<br>CD8+TLR-4+ [%]   | 0.615 | 2.919 | 0.011* | CD4+TLR-8+ [%] &<br>sTLR-7 [ng/mL]  | 0.995 | 36.669 | 0.000* |
| CD8+TLR-9+ [%] &<br>CD19+TLR-2+ [%]  | 0.624 | 2.984 | 0.010* | CD4+TLR-7+ [%] &<br>sTLR-3 [ng/mL]  | 0.998 | 56.180 | 0.000* |
| CD19+TLR-8+ [%] &<br>CD19+TLR-3+ [%] | 0.630 | 3.037 | 0.009* | CD4+TLR-8+ [%] &<br>sTLR-3 [ng/mL]  | 0.998 | 56.180 | 0.000* |
| CD4+TLR-9+ [%] &<br>CD19+TLR-4+ [%]  | 0.632 | 3.054 | 0.009* | CD4+TLR-8+ [%] &<br>CD4+TLR-7+ [%]  | 0.999 | 68.815 | 0.000* |

\* Statistically significant results
